# Supplementary material for: Pharmacokinetics of Clavulanic Acid in the Pediatric Population: A Systematic Literature Review
Source: Springer Nature journal article supplement (doi:10.1007/s40262-022-01116-3), 2022-03-31
Supplement: MOESM1 [file 20272046]

## **Supplementary material: Pharmacokinetics of clavulanic acid in the pediatric population: a systematic literature review**

Fleur M. Keij<sup>1,2</sup>, Gerdien A. Tramper-Stranders<sup>1,2</sup>, Birgit C.P. Koch<sup>3</sup>, Irwin K.M. Reiss<sup>1</sup>, Anouk E. Muller<sup>4,5</sup>, René F. Kornelisse<sup>1</sup>, Karel Allegaert<sup>3,6,7</sup>

<sup>1</sup> Department of Pediatrics, Division of Neonatology, Erasmus MC Sophia Children's Hospital, Erasmus University Medical Center Rotterdam, Rotterdam, The Netherlands

<sup>2</sup> Department of Pediatrics, Franciscus Gasthuis & Vlietland, Rotterdam, The Netherlands

<sup>3</sup> Department of Hospital Pharmacy, Erasmus University Medical Center Rotterdam, Rotterdam, the Netherlands

<sup>4</sup> Department of Medical Microbiology and Infectious Diseases, Erasmus University Medical Center Rotterdam, Rotterdam, the Netherlands

<sup>5</sup> Department of Medical Microbiology, Haaglanden Medical Center, The Hague, the Netherlands

<sup>6</sup> Department of Development and Regeneration, KU Leuven, Leuven, Belgium

<sup>7</sup> Department of Pharmaceutical and Pharmacological Sciences, KU Leuven, Leuven, Belgium

**Journal: Clinical Pharmacokinetics**

### **Corresponding author**

Fleur M. Keij

Erasmus MC-Sophia Children's Hospital

Doctor Molenwaterplein 40

3015 CN, Rotterdam, the Netherlands

[f.keij@erasmusmc.nl](mailto:f.keij@erasmusmc.nl)

**S1: Prisma checklist**

**S2: Search strategy**

**S3: Quality assessment ClinPK tool**

**S4: Additional data**

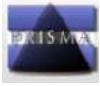

# PRISMA 2020 Checklist

| Section and Topic             | Item # | Checklist item                                                                                                                                                                                                                                                                                       | Location where item is reported |
|-------------------------------|--------|------------------------------------------------------------------------------------------------------------------------------------------------------------------------------------------------------------------------------------------------------------------------------------------------------|---------------------------------|
| <b>TITLE</b>                  |        |                                                                                                                                                                                                                                                                                                      |                                 |
| Title                         | 1      | Identify the report as a systematic review.                                                                                                                                                                                                                                                          | Page 1                          |
| <b>ABSTRACT</b>               |        |                                                                                                                                                                                                                                                                                                      |                                 |
| Abstract                      | 2      | See the PRISMA 2020 for Abstracts checklist.                                                                                                                                                                                                                                                         | Page 2                          |
| <b>INTRODUCTION</b>           |        |                                                                                                                                                                                                                                                                                                      |                                 |
| Rationale                     | 3      | Describe the rationale for the review in the context of existing knowledge.                                                                                                                                                                                                                          | Page 5                          |
| Objectives                    | 4      | Provide an explicit statement of the objective(s) or question(s) the review addresses.                                                                                                                                                                                                               | Page 5                          |
| <b>METHODS</b>                |        |                                                                                                                                                                                                                                                                                                      |                                 |
| Eligibility criteria          | 5      | Specify the inclusion and exclusion criteria for the review and how studies were grouped for the syntheses.                                                                                                                                                                                          | Page 6                          |
| Information sources           | 6      | Specify all databases, registers, websites, organisations, reference lists and other sources searched or consulted to identify studies. Specify the date when each source was last searched or consulted.                                                                                            | Page 6                          |
| Search strategy               | 7      | Present the full search strategies for all databases, registers and websites, including any filters and limits used.                                                                                                                                                                                 | Suppl material                  |
| Selection process             | 8      | Specify the methods used to decide whether a study met the inclusion criteria of the review, including how many reviewers screened each record and each report retrieved, whether they worked independently, and if applicable, details of automation tools used in the process.                     | Page 6                          |
| Data collection process       | 9      | Specify the methods used to collect data from reports, including how many reviewers collected data from each report, whether they worked independently, any processes for obtaining or confirming data from study investigators, and if applicable, details of automation tools used in the process. | Page 6                          |
| Data items                    | 10a    | List and define all outcomes for which data were sought. Specify whether all results that were compatible with each outcome domain in each study were sought (e.g. for all measures, time points, analyses), and if not, the methods used to decide which results to collect.                        | Page 6-7                        |
|                               | 10b    | List and define all other variables for which data were sought (e.g. participant and intervention characteristics, funding sources). Describe any assumptions made about any missing or unclear information.                                                                                         | Page 6-7                        |
| Study risk of bias assessment | 11     | Specify the methods used to assess risk of bias in the included studies, including details of the tool(s) used, how many reviewers assessed each study and whether they worked independently, and if applicable, details of automation tools used in the process.                                    | Page 6                          |
| Effect measures               | 12     | Specify for each outcome the effect measure(s) (e.g. risk ratio, mean difference) used in the synthesis or presentation of results.                                                                                                                                                                  | Page 7                          |
| Synthesis methods             | 13a    | Describe the processes used to decide which studies were eligible for each synthesis (e.g. tabulating the study intervention characteristics and comparing against the planned groups for each synthesis (item #5)).                                                                                 | Not applicable                  |
|                               | 13b    | Describe any methods required to prepare the data for presentation or synthesis, such as handling of missing summary statistics, or data conversions.                                                                                                                                                | Page 7                          |
|                               | 13c    | Describe any methods used to tabulate or visually display results of individual studies and syntheses.                                                                                                                                                                                               | Page 7                          |
|                               | 13d    | Describe any methods used to synthesize results and provide a rationale for the choice(s). If meta-analysis was performed, describe the model(s), method(s) to identify the presence and extent of statistical heterogeneity, and software package(s) used.                                          | Not applicable                  |
|                               | 13e    | Describe any methods used to explore possible causes of heterogeneity among study results (e.g. subgroup analysis, meta-regression).                                                                                                                                                                 | Not applicable                  |
|                               | 13f    | Describe any sensitivity analyses conducted to assess robustness of the synthesized results.                                                                                                                                                                                                         | Not applicable                  |
| Reporting bias                | 14     | Describe any methods used to assess risk of bias due to missing results in a synthesis (arising from reporting biases).                                                                                                                                                                              | Not                             |



# PRISMA 2020 Checklist

| Section and Topic             | Item # | Checklist item                                                                                                                                                                                                                                                                       | Location where item is reported |
|-------------------------------|--------|--------------------------------------------------------------------------------------------------------------------------------------------------------------------------------------------------------------------------------------------------------------------------------------|---------------------------------|
| assessment                    |        |                                                                                                                                                                                                                                                                                      | applicable                      |
| Certainty assessment          | 15     | Describe any methods used to assess certainty (or confidence) in the body of evidence for an outcome.                                                                                                                                                                                | Not applicable                  |
| <b>RESULTS</b>                |        |                                                                                                                                                                                                                                                                                      |                                 |
| Study selection               | 16a    | Describe the results of the search and selection process, from the number of records identified in the search to the number of studies included in the review, ideally using a flow diagram.                                                                                         | Page 8                          |
|                               | 16b    | Cite studies that might appear to meet the inclusion criteria, but which were excluded, and explain why they were excluded.                                                                                                                                                          | Figure 1                        |
| Study characteristics         | 17     | Cite each included study and present its characteristics.                                                                                                                                                                                                                            | Table 1                         |
| Risk of bias in studies       | 18     | Present assessments of risk of bias for each included study.                                                                                                                                                                                                                         | Suppl material                  |
| Results of individual studies | 19     | For all outcomes, present, for each study: (a) summary statistics for each group (where appropriate) and (b) an effect estimate and its precision (e.g. confidence/credible interval), ideally using structured tables or plots.                                                     | Table 2                         |
| Results of syntheses          | 20a    | For each synthesis, briefly summarise the characteristics and risk of bias among contributing studies.                                                                                                                                                                               | Not applicable                  |
|                               | 20b    | Present results of all statistical syntheses conducted. If meta-analysis was done, present for each the summary estimate and its precision (e.g. confidence/credible interval) and measures of statistical heterogeneity. If comparing groups, describe the direction of the effect. | Not applicable                  |
|                               | 20c    | Present results of all investigations of possible causes of heterogeneity among study results.                                                                                                                                                                                       | Not applicable                  |
|                               | 20d    | Present results of all sensitivity analyses conducted to assess the robustness of the synthesized results.                                                                                                                                                                           | Not applicable                  |
| Reporting biases              | 21     | Present assessments of risk of bias due to missing results (arising from reporting biases) for each synthesis assessed.                                                                                                                                                              | Not applicable                  |
| Certainty of evidence         | 22     | Present assessments of certainty (or confidence) in the body of evidence for each outcome assessed.                                                                                                                                                                                  | Not applicable                  |
| <b>DISCUSSION</b>             |        |                                                                                                                                                                                                                                                                                      |                                 |
| Discussion                    | 23a    | Provide a general interpretation of the results in the context of other evidence.                                                                                                                                                                                                    | Page 9-12                       |
|                               | 23b    | Discuss any limitations of the evidence included in the review.                                                                                                                                                                                                                      | Page 9-12                       |
|                               | 23c    | Discuss any limitations of the review processes used.                                                                                                                                                                                                                                | Page 17                         |
|                               | 23d    | Discuss implications of the results for practice, policy, and future research.                                                                                                                                                                                                       | Page 17                         |
| <b>OTHER INFORMATION</b>      |        |                                                                                                                                                                                                                                                                                      |                                 |
| Registration and protocol     | 24a    | Provide registration information for the review, including register name and registration number, or state that the review was not registered.                                                                                                                                       | Page 6 & abstract               |
|                               | 24b    | Indicate where the review protocol can be accessed, or state that a protocol was not prepared.                                                                                                                                                                                       | Page 6                          |
|                               | 24c    | Describe and explain any amendments to information provided at registration or in the protocol.                                                                                                                                                                                      | Not applicable                  |
| Support                       | 25     | Describe sources of financial or non-financial support for the review, and the role of the funders or sponsors in the review.                                                                                                                                                        | Page 18                         |

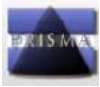

## PRISMA 2020 Checklist

| Section and Topic                              | Item # | Checklist item                                                                                                                                                                                                                             | Location where item is reported              |
|------------------------------------------------|--------|--------------------------------------------------------------------------------------------------------------------------------------------------------------------------------------------------------------------------------------------|----------------------------------------------|
| Competing interests                            | 26     | Declare any competing interests of review authors.                                                                                                                                                                                         | Page 18                                      |
| Availability of data, code and other materials | 27     | Report which of the following are publicly available and where they can be found: template data collection forms; data extracted from included studies; data used for all analyses; analytic code; any other materials used in the review. | Extracted data: table 1&2 and suppl material |

## S2\_Search Strategy

| Database searched                              | Platform         | Years of coverage | Records     | Records after duplicates removed |
|------------------------------------------------|------------------|-------------------|-------------|----------------------------------|
| Embase                                         | Embase.com       | 1971 - Present    | 2292        | 2273                             |
| Medline ALL                                    | Ovid             | 1946 - Present    | 601         | 172                              |
| Web of Science Core Collection*                | Web of Knowledge | 1975 - Present    | 458         | 137                              |
| Cochrane Central Register of Controlled Trials | Wiley            | 1992 - Present    | 332         | 75                               |
| Additional Search Engines: Google Scholar      |                  |                   | 200         | 111                              |
| <b>Total</b>                                   |                  |                   | <b>3883</b> | <b>2768</b>                      |

\*Science Citation Index Expanded (1975-present) ; Social Sciences Citation Index (1975-present) ; Arts & Humanities Citation Index (1975-present) ; Conference Proceedings Citation Index- Science (1990-present) ; Conference Proceedings Citation Index- Social Science & Humanities (1990-present) ; Emerging Sources Citation Index (2005-present)

### Embase.com

('amoxicillin plus clavulanic acid'/de OR 'clavulanate potassium'/de OR 'clavulanic acid'/de OR (clavulan\*):ab,ti,kw) **AND** ('pharmacokinetics'/exp OR 'drug concentration'/exp OR 'urine level'/de OR 'saliva level'/exp OR 'pharmacokinetics':lnk OR 'safety'/de OR 'drug safety'/exp OR 'pharmacokinetic parameters'/exp OR 'area under the curve'/exp OR 'blood level'/de OR 'peak-trough fluctuation'/de OR (pharmacokinetic\* OR ((drug\* OR pharma\* OR clavulan\*) NEAR/3 (kinetic\* OR dynamic\*)) OR absorpt\* OR distribut\* OR biotransform\* OR bio-transform\* OR eliminat\* OR bioavailab\* OR clearance\* OR excret\* OR half-life\* OR metabolism\* OR ((drug\* OR pharma\* OR clavulan\* OR plasma\* OR blood\* OR serum\* OR urine\* OR saliva\* OR peak\* OR trough\*) NEAR/3 (concentration\* OR level\*)) OR pharmacodynamic\* OR safe\* OR ((area\*) NEAR/3 (curve\*)) OR AUC\* OR PK-PD):ab,ti,kw) **AND** (child/exp OR adolescent/exp OR adolescence/exp OR 'child behavior'/de OR 'child parent relation'/de OR 'pediatrics'/exp OR 'childhood'/exp OR 'child nutrition'/de OR 'infant nutrition'/exp OR 'child welfare'/de OR 'child abuse'/de OR 'child advocacy'/de OR 'child development'/de OR 'child growth'/de OR 'child health'/de OR 'child health care'/exp OR 'child care'/exp OR 'childhood disease'/exp OR 'child death'/de OR 'child psychiatry'/de OR 'child psychology'/de OR 'pediatric ward'/de OR 'pediatric hospital'/de OR 'pediatric anesthesia'/de OR 'pediatric intensive care unit'/de OR 'neonatal intensive care unit'/de OR 'prematurity'/de OR (adolescen\* OR preadolescen\* OR infan\* OR newborn\* OR (new NEXT/1 born\*) OR baby OR babies OR neonat\* OR prematur\* OR pre-matur\* OR child\* OR kid OR kids OR toddler\* OR teen\* OR boy\* OR girl\* OR minors OR underag\* OR (under NEXT/1 (age\* OR aging OR ageing)) OR juvenil\* OR youth\* OR kindergar\* OR puber\* OR pubescen\* OR prepubescen\* OR prepubert\* OR pediatric\* OR paediatric\* OR school\* OR preschool\* OR highschool\* OR suckling\* OR PICU OR NICU OR PICUs OR NICUs):ab,ti,kw) **NOT** ([animals]/lim NOT [humans]/lim)

### Medline (Ovid)

(exp Clavulanic Acids/ OR (clavulan\*).ab,ti,kf.) **AND** (exp Pharmacokinetics/ OR pharmacokinetics.fs. OR Safety/ OR Area Under Curve/ OR (pharmacokinetic\* OR ((drug\* OR pharma\* OR clavulan\*) ADJ3 (kinetic\* OR dynamic\*)) OR absorpt\* OR distribut\* OR biotransform\* OR bio-transform\* OR eliminat\* OR bioavailab\* OR clearance\* OR excret\* OR half-life\* OR metabolism\* OR ((drug\* OR pharma\* OR clavulan\* OR plasma\* OR blood\* OR serum\* OR urine\* OR saliva\* OR peak\* OR trough\*) ADJ3 (concentration\* OR level\*)) OR pharmacodynamic\* OR safe\* OR ((area\*) ADJ3 (curve\*)) OR AUC\* OR PK-PD).ab,ti,kf.) **AND** (exp Child/ OR exp Infant/ OR exp Adolescent/ OR exp "Child Behavior"/ OR exp "Parent Child Relations"/ OR exp "Pediatrics"/ OR "Child Nutrition Sciences"/ OR "Infant nutritional physiological phenomena"/ OR exp "Child Welfare"/ OR "Child Development"/ OR exp "Child Health Services"/ OR exp "Child Care"/ OR "Child Rearing"/ OR exp "Child development Disorders, Pervasive"/ OR "Child Psychiatry"/ OR "Child Psychology"/ OR "Hospitals, Pediatric"/ OR exp "Intensive Care Units, Pediatric"/ OR (adolescen\* OR infan\* OR newborn\* OR (new ADJ born\*) OR baby OR babies OR neonat\* OR prematur\* OR pre-matur\* OR child\* OR kid OR kids OR toddler\* OR teen\* OR boy\* OR girl\* OR minors OR underag\* OR (under ADJ1 (age\* OR aging OR ageing)) OR juvenil\* OR youth\* OR kindergar\* OR puber\* OR pubescen\* OR prepubescen\* OR prepubert\* OR pediatric\* OR paediatric\* OR school\* OR preschool\* OR highschool\* OR suckling\* OR PICU OR NICU OR PICUs OR NICUs).ab,ti,kf.) **NOT** (exp animals/ NOT humans/)

### Web of Science

TS=((clavulan\*)) **AND** ((pharmacokinetic\* OR ((drug\* OR pharma\* OR clavulan\*) NEAR/2 (kinetic\* OR dynamic\*)) OR absorpt\* OR distribut\* OR biotransform\* OR bio-transform\* OR eliminat\* OR bioavailab\* OR clearance\* OR excret\* OR half-life\* OR metabolism\* OR ((drug\* OR pharma\* OR clavulan\* OR plasma\* OR blood\* OR serum\* OR urine\* OR saliva\* OR peak\* OR trough\*) NEAR/2 (concentration\* OR level\*)) OR pharmacodynamic\* OR safe\* OR ((area\*) NEAR/2 (curve\*)) OR AUC\* OR PK-PD)) **AND** ((adolescen\* OR preadolescen\* OR infan\* OR newborn\* OR (new NEAR/1 born\*) OR baby OR babies OR neonat\* OR prematur\* OR pre-matur\* OR child\* OR kid OR kids OR toddler\* OR teen\* OR boy\* OR girl\* OR minors OR underag\* OR (under NEAR/1 (age\* OR aging OR ageing)) OR juvenil\* OR youth\* OR kindergar\* OR puber\* OR pubescen\* OR prepubescen\* OR prepubert\* OR pediatric\* OR paediatric\* OR school\* OR preschool\* OR highschool\* OR suckling\* OR PICU OR NICU OR PICUs OR NICUs)) **NOT** ((animal\* OR rat OR rats OR mouse OR mice OR murine OR dog OR dogs OR canine OR cat OR cats OR feline OR rabbit OR cow OR cows OR bovine OR rodent\* OR sheep OR ovine OR pig OR swine OR porcine OR veterinar\* OR chick\* OR zebrafish\* OR baboon\* OR nonhuman\* OR primate\* OR cattle\* OR goose OR geese OR duck OR macaque\* OR avian\* OR bird\* OR fish\*) NOT (human\* OR patient\* OR women OR woman OR men OR man)))

### Cochrane CENTRAL

((clavulan\*):ab,ti,kw) **AND** ((pharmacokinetic\* OR ((drug\* OR pharma\* OR clavulan\*) NEAR/3 (kinetic\* OR dynamic\*)) OR absorpt\* OR distribut\* OR biotransform\* OR bio NEXT transform\* OR eliminat\* OR bioavailab\* OR clearance\* OR excret\* OR half NEXT life\* OR metabolism\* OR ((drug\* OR pharma\* OR clavulan\* OR plasma\* OR blood\* OR serum\* OR urine\* OR saliva\* OR peak\* OR trough\*) NEAR/3 (concentration\* OR level\*)) OR pharmacodynamic\* OR safe\* OR ((area\*) NEAR/3 (curve\*)) OR AUC\* OR

PK NEXT PD):ab,ti,kw) **AND** ((adolescen\* OR preadolescen\* OR infan\* OR newborn\* OR (new NEXT/1 born\*) OR baby OR babies OR neonat\* OR prematur\* OR pre NEXT matur\* OR child\* OR kid OR kids OR toddler\* OR teen\* OR boy\* OR girl\* OR minors OR underag\* OR (under NEXT/1 (age\* OR aging OR ageing)) OR juvenil\* OR youth\* OR kindergar\* OR puber\* OR pubescen\* OR prepubescen\* OR prepubert\* OR pediatric\* OR paediatric\* OR school\* OR preschool\* OR highschool\* OR suckling\* OR PICU OR NICU OR PICUs OR NICUs):ab,ti,kw)

**Google Scholar** *Top 200 relevant references*

Clavulanate|clavulanic pharmacokinetics|'drug|clavulanic|clavulanate  
kinetics|absorption|distribution|elimination|clearance|excretion|half-life|metabolism'  
infants|newborns|babies|neonates|prematurity|children|kids|toddlers|boys|girls|PICU|NICU

| <b>Checklist Item</b>        |                                                                                                                                                                                                                                                                                          |
|------------------------------|------------------------------------------------------------------------------------------------------------------------------------------------------------------------------------------------------------------------------------------------------------------------------------------|
| <b>Title/Abstract</b>        |                                                                                                                                                                                                                                                                                          |
| 1.                           | The title identifies the drug(s) and patient population(s) studied.                                                                                                                                                                                                                      |
| 2.                           | The abstract minimally includes the name of the drug(s) studied, the route of administration, the population in whom it was studied, and the results of the primary objective and major clinical pharmacokinetic findings.                                                               |
| <b>Background</b>            |                                                                                                                                                                                                                                                                                          |
| 3.                           | Pharmacokinetic data (i.e., absorption, distribution, metabolism, excretion) that [are] known and relevant to the drugs being studied [are] described.                                                                                                                                   |
| 4.                           | An explanation of the study rationale is provided.                                                                                                                                                                                                                                       |
| 5.                           | Specific objectives or hypotheses [are] provided.                                                                                                                                                                                                                                        |
| <b>Methods</b>               |                                                                                                                                                                                                                                                                                          |
| 6.                           | Eligibility criteria of study participants are described.                                                                                                                                                                                                                                |
| 7.                           | Co-administration (or lack thereof) of study drug(s) with other potentially interacting drugs or food within this study is described.                                                                                                                                                    |
| 8.                           | Drug preparation and administration characteristics including dose, route, formulation, infusion duration (if applicable), and frequency are described.                                                                                                                                  |
| 9.                           | Body fluid or tissue sampling (timing, frequency, and storage) for quantitative drug measurement is described.                                                                                                                                                                           |
| 10.                          | Validation of quantitative bioanalytical methods used in the study [is] referenced or described if applicable.                                                                                                                                                                           |
| 11.                          | Pharmacokinetic modeling methods and software used are described, including assumptions made regarding the number of compartments and order of kinetics (zero, first, or mixed order).                                                                                                   |
| 12.                          | For population pharmacokinetic studies, covariates incorporated into pharmacokinetic models are identified and described.                                                                                                                                                                |
| 13.                          | Formulas for calculated variables (such as creatinine clearance, body surface area, AUC, and adjusted body weight) are provided or referenced.                                                                                                                                           |
| 14.                          | The specific body weight used in drug dosing and pharmacokinetic calculations [is] reported (i.e., ideal body weight versus actual body weight versus adjusted body weight).                                                                                                             |
| 15.                          | Statistical methods including software used are described.                                                                                                                                                                                                                               |
| <b>Results</b>               |                                                                                                                                                                                                                                                                                          |
| 16.                          | Study withdrawals or subjects lost to follow-up (or lack thereof) are reported.                                                                                                                                                                                                          |
| 17.                          | Quantification of missing or excluded data is provided if applicable.                                                                                                                                                                                                                    |
| 18.                          | All relevant variables that may explain inter- and intra-patient pharmacokinetic variability (including: age, sex, end-organ function, ethnicity, weight or BMI, health status or severity of illness, and pertinent co-morbidities) are provided with appropriate measures of variance. |
| 19.                          | Results of pharmacokinetic analyses are reported with appropriate measures of precision (such as range or 95% confidence intervals).                                                                                                                                                     |
| 20.                          | Studies in patients receiving extracorporeal drug removal (i.e., dialysis) should report the mode of drug removal, type of filters used, duration of therapy, and relevant flow rates.                                                                                                   |
| 21.                          | In studies of drug bioavailability comparing two formulations of the same drug, F (bioavailability), AUC, Cmax (maximal concentration), and Tmax (time to maximal concentration) should be reported.                                                                                     |
| <b>Discussion/Conclusion</b> |                                                                                                                                                                                                                                                                                          |
| 22.                          | Study limitations describing potential sources of bias and imprecision where relevant should be described.                                                                                                                                                                               |
| 23.                          | The relevance of study findings (applicability, external validity) is described.                                                                                                                                                                                                         |
| <b>Other Information</b>     |                                                                                                                                                                                                                                                                                          |
| 24.                          | Funding sources and conflicts of interest for the authors are disclosed.                                                                                                                                                                                                                 |



**Table. ClinPK and checklist results**

|     | Al Roomi 1984                                                           | Begue 1982                                                        | Begue 1986                                                                     | Burstein 1994                                    | de Cock 2015                                     | Fayed 1987                                          | Feldman 1985 | Fricke 1989                                                                         | Hoberman 1989                                                                 | Jacobs 1985                                                                       |
|-----|-------------------------------------------------------------------------|-------------------------------------------------------------------|--------------------------------------------------------------------------------|--------------------------------------------------|--------------------------------------------------|-----------------------------------------------------|--------------|-------------------------------------------------------------------------------------|-------------------------------------------------------------------------------|-----------------------------------------------------------------------------------|
| 1.  | Yes, population was not specified but paper published pediatric journal | yes                                                               | Yes                                                                            | yes                                              | yes                                              | yes                                                 | yes          | yes                                                                                 | yes                                                                           | yes                                                                               |
| 2.  | No                                                                      | Yes                                                               | Yes                                                                            | Yes                                              | Yes                                              | Yes                                                 | No           | yes                                                                                 | yes                                                                           | yes                                                                               |
| 3.  | No                                                                      | Yes                                                               | No                                                                             | Yes                                              | Yes                                              | yes                                                 | Yes          | yes                                                                                 | yes                                                                           | yes                                                                               |
| 4.  | Yes                                                                     | Yes                                                               | Yes                                                                            | Yes                                              | Yes                                              | yes                                                 | yes          | yes                                                                                 | yes                                                                           | yes                                                                               |
| 5.  | Yes                                                                     | Yes                                                               | Yes                                                                            | Yes                                              | Yes                                              | yes                                                 | yes          | yes                                                                                 | yes                                                                           | yes                                                                               |
| 6.  | Yes                                                                     | Yes                                                               | Yes                                                                            | Yes                                              | Yes                                              | Yes                                                 | yes          | yes                                                                                 | yes                                                                           | yes                                                                               |
| 7.  | Yes, food reported, co-medication not                                   | Yes, food reported, co-medication not                             | Yes, co-medication reported, food not applicable                               | Yes, co-medication reported, food not applicable | Yes, co-medication reported, food not applicable | No, co-medication not reported, food not applicable | yes          | No, co-medication not reported, food not applicable                                 | yes                                                                           | yes                                                                               |
| 8.  | Yes                                                                     | yes                                                               | yes                                                                            | yes                                              | yes                                              | yes                                                 | yes          | yes                                                                                 | yes                                                                           | yes                                                                               |
| 9.  | Yes, serum and urine                                                    | yes                                                               | Yes, serum and urine                                                           | yes                                              | yes                                              | Yes, serum and urine                                | yes          | yes                                                                                 | yes, middle ear                                                               | yes                                                                               |
| 10. | Agar plate method                                                       | Agar plate method                                                 | Agar plate method                                                              | Agar plate method                                | UPLC MS/MS                                       | Agar plate method                                   | HPLC         | Agar plate method                                                                   | not reported                                                                  | HPLC                                                                              |
| 11. | n.a.                                                                    | n.a.                                                              | n.a.                                                                           | yes, adapt 2                                     | yes, NONMEM 7.3                                  | n.a.                                                | Lagran AUC   | ad hoc software                                                                     | n.a.                                                                          | ESTRIP/KINONITE                                                                   |
| 12. | n.a.                                                                    | n.a.                                                              | n.a.                                                                           | n.a.                                             | yes                                              | n.a.                                                | n.a.         | n.a.                                                                                | n.a.                                                                          | n.a.                                                                              |
| 13. | n.a.                                                                    | n.a.                                                              | n.a.                                                                           | n.a.                                             | yes                                              | n.a.                                                | n.a.         | n.a.                                                                                | n.a.                                                                          | n.a.                                                                              |
| 14. | No weight provided                                                      | No                                                                | Yes                                                                            | yes                                              | yes                                              | Yes                                                 | no           | Yes                                                                                 | No                                                                            | yes                                                                               |
| 15. | n.a.                                                                    | n.a.                                                              | n.a.                                                                           | n.a.                                             | yes R version 7.3                                | n.a.                                                | n.a.         | n.a.                                                                                | n.a.                                                                          | n.a.                                                                              |
| 16. | n.a.                                                                    | n.a.                                                              | n.a.                                                                           | n.a.                                             | n.a.                                             | n.a.                                                | n.a.         | n.a.                                                                                | n.a.                                                                          | n.a.                                                                              |
| 17. | n.a.                                                                    | n.a.                                                              | n.a.                                                                           | n.a.                                             | yes                                              | n.a.                                                | n.a.         | n.a.                                                                                | n.a.                                                                          | n.a.                                                                              |
| 18. | no, only average age                                                    | no, only average age                                              | yes, raw data are provided                                                     | yes                                              | yes                                              | no, average                                         | no, average  | yes, raw data provided                                                              | no, average                                                                   | no, average                                                                       |
| 19. | n.a. concentrations reported (mean + SD)                                | n.a. serum concentrations reported (mean + SEM); T <sub>1/2</sub> | n.a. individual concentrations are reported, T <sub>1/2</sub> , V <sub>d</sub> | yes                                              | yes                                              | n.a.                                                | n.a.         | n.a. individual concentrations are reported T <sub>1/2</sub> , V <sub>d</sub> , AUC | n.a. mean concentrations are reported T <sub>1/2</sub> , V <sub>d</sub> , AUC | n.a. mean concentrations are reported T <sub>1/2</sub> , V <sub>d</sub> , AUC, CI |
| 20. | n.a.                                                                    | n.a.                                                              | n.a.                                                                           | n.a.                                             | n.a.                                             | n.a.                                                | n.a.         | n.a.                                                                                | n.a.                                                                          | n.a.                                                                              |
| 21. | n.a.                                                                    | n.a.                                                              | n.a.                                                                           | n.a.                                             | n.a.                                             | n.a.                                                | n.a.         | n.a.                                                                                | n.a.                                                                          | n.a.                                                                              |
| 22. | Partial                                                                 | Partial                                                           | Partial                                                                        | yes                                              | yes                                              | Partial                                             | yes          | yes                                                                                 | yes                                                                           | yes                                                                               |
| 23. | Yes                                                                     | yes                                                               | yes                                                                            | yes                                              | yes                                              | Yes                                                 | yes          | yes                                                                                 | yes                                                                           | yes                                                                               |
| 24. | Yes                                                                     | No                                                                | No                                                                             | Yes                                              | yes                                              | no                                                  | no           | Yes                                                                                 | Yes                                                                           | no                                                                                |

|     | Jehl 2003                       | Jones 1990                                                      | Miall Allen 1988                                 | Nelson 1982                                    | van Niekerk 1985                               | Reed 1995                                          | Schaad 1983                                        | Schaad 1986                                        |
|-----|---------------------------------|-----------------------------------------------------------------|--------------------------------------------------|------------------------------------------------|------------------------------------------------|----------------------------------------------------|----------------------------------------------------|----------------------------------------------------|
| 1.  | yes                             | yes                                                             | yes                                              | yes                                            | yes                                            | yes                                                | yes                                                | yes                                                |
| 2.  | yes                             | yes                                                             | yes                                              | yes                                            | yes                                            | yes                                                | yes                                                | yes                                                |
| 3.  | yes                             | yes                                                             | yes                                              | Yes, but not in clear paragraphs               | yes                                            | yes                                                | yes                                                | yes                                                |
| 4.  | yes                             | yes                                                             | yes                                              | yes                                            | yes                                            | yes                                                | yes                                                | yes                                                |
| 5.  | yes                             | yes                                                             | yes                                              | yes                                            | yes                                            | yes                                                | yes                                                | yes                                                |
| 6.  | yes                             | yes                                                             | yes                                              | yes                                            | yes                                            | yes                                                | yes                                                | yes                                                |
| 7.  | yes                             | Yes, co-medication reported, food not applicable                | Yes, co-medication reported, food not applicable | Yes, co-medication reported, food not reported | Yes, co-medication reported, food not reported | Yes, co-medication reported, food not reported     | Yes, co-medication reported, food not applicable   | Yes, co-medication and food reported               |
| 8.  | yes                             | yes                                                             | yes                                              | yes                                            | yes                                            | yes                                                | yes                                                | yes                                                |
| 9.  | yes, serum and middle ear fluid | yes                                                             | yes                                              | yes                                            | yes                                            | Yes, serum and urine                               | Yes, serum and urine                               | Yes, serum and urine                               |
| 10. | HPLC                            | Agar plate method                                               | Agar plate method                                | agar plate method                              | Agar plate method                              | HPLC                                               | Agar plate method                                  | Agar plate method                                  |
| 11. | n.a.                            | n.a.                                                            | n.a.                                             | n.a.                                           | n.a.                                           | n.a.                                               | n.a.                                               | n.a.                                               |
| 12. | n.a.                            | n.a.                                                            | n.a.                                             | n.a.                                           | n.a.                                           | n.a.                                               | n.a.                                               | n.a.                                               |
| 13. | n.a.                            | n.a.                                                            | n.a.                                             | n.a.                                           | n.a.                                           | n.a.                                               | n.a.                                               | n.a.                                               |
| 14. | Yes                             | yes                                                             | yes                                              | no                                             | n.a.                                           | n.a.                                               | No weight provided                                 | No weight provided                                 |
| 15. | n.a.                            | n.a.                                                            | n.a.                                             | n.a.                                           | n.a.                                           | n.a.                                               | n.a.                                               | n.a.                                               |
| 16. | n.a.                            | n.a.                                                            | n.a.                                             | n.a.                                           | n.a.                                           | n.a.                                               | n.a.                                               | n.a.                                               |
| 17. | n.a.                            | n.a.                                                            | n.a.                                             | n.a.                                           | n.a.                                           | n.a.                                               | n.a.                                               | n.a.                                               |
| 18. | no, average                     | no, average                                                     | no, average                                      | no, average                                    | no, average                                    | no, average                                        | no, average                                        | no, average                                        |
| 19. | n.a.                            | n.a. mean concentrations are reported, AUC, k, T <sub>1/2</sub> | n.a. mean concentrations + SD are reported       | n.a. mean concentrations + SEM are reported    | n.a. mean concentrations + SEM are reported    | n.a. mean concentrations, Cl, AUC, Vd are reported | n.a. mean concentrations, Cl, AUC, Vd are reported | n.a. mean concentrations, Cl, AUC, Vd are reported |
| 20. | n.a.                            | n.a.                                                            | n.a.                                             | n.a.                                           | n.a.                                           | n.a.                                               | n.a.                                               | n.a.                                               |
| 21. | n.a.                            | n.a.                                                            | n.a.                                             | n.a.                                           | n.a.                                           | n.a.                                               | n.a.                                               | n.a.                                               |
| 22. | yes                             | yes                                                             | yes                                              | yes                                            | yes                                            | yes                                                | yes                                                | yes                                                |
| 23. | yes                             | yes                                                             | yes                                              | yes                                            | yes                                            | yes                                                | yes                                                | yes                                                |
| 24. | no                              | no                                                              | yes                                              | yes                                            | yes                                            | yes                                                | no                                                 | no                                                 |

## S4\_ Additional data

| Reference                        | population                           | Dosing regimen                                                                                    | Cmax (mg/L)              | Tmax (h)            | Vd (L)                              | Bioavailability (%)          | Cl                                                                          | AUC (mg·h/L)                                                                   |
|----------------------------------|--------------------------------------|---------------------------------------------------------------------------------------------------|--------------------------|---------------------|-------------------------------------|------------------------------|-----------------------------------------------------------------------------|--------------------------------------------------------------------------------|
| <b>Carlier et al (2013)</b>      | ICU patients > 18 years              | Amoxicillin/clavulanic acid<br>100-200 mg/dose                                                    | -                        | -                   | 19.2                                | -                            | 6.8 L/h                                                                     | -                                                                              |
| <b>De Velde et al (2018)</b>     | Healthy males > 18 years             | Amoxicillin/clavulanic acid<br><i>oral</i><br>varying dosing regimens                             | 2.21±0.78<br>(0.21-4.35) | 1.29±0.32           | -                                   | -                            | First order elimination:<br>24.6 L/h<br>(26.7% between subject variability) | 4.82±1.53<br>(0.44-8.31 (0-8hrs))                                              |
| <b>Vree et al (2003)</b>         | Healthy subjects >18 years           | Amoxicillin/clavulanic acid<br><i>oral</i><br>varying amoxicillin dosing + 125 mg clavulanic acid | 1.15-3.79                | 0.7-1.78            | -                                   | -                            | -                                                                           | 1.5-8                                                                          |
| <b>Kaye et al (2001)</b>         | Healthy males and females > 18 years | Amoxicillin/clavulanic acid<br><i>oral; single dose</i><br>(2000/125 mg)                          | 2.05±0.80                | 1.03<br>(0.75-3.0)  | -                                   | -                            | -                                                                           | 5.29 ± 1.55                                                                    |
| <b>Bolton et al (1986)</b>       | Healthy subjects >18 years           | Clavulanic acid<br><i>intravenous and oral</i><br>125 mg/dose                                     | -                        | Oral: 0.75<br>iv: - | Oral: -<br>iv: 12.01<br>(10/1-14.3) | 64 (51-75)                   | Oral: 6.6 L/h<br>iv: 6 L/h                                                  | Oral: 7.7<br>iv: 10.6                                                          |
| <b>Nilsson-Ehle et al (1985)</b> | 10 healthy man > 18 years            | Amoxicillin/clavulanic acid<br><i>intravenous and oral</i><br>Single dose 125 mg                  | oral:<br>2.3±0.88 mg/L   | 1.3 h<br>(1.0-2.0)  | -                                   | 60.0 ± 23.1<br>(31.4 - 98.8) | 14.88±3.3 L/h x 1.73                                                        | oral: 4.6±1.6 mg·h/Lx1.73 <sup>2</sup><br>iv: 7.1±1.6 mg·h/Lx1.73 <sup>2</sup> |

**Table 1. Pharmacokinetics of clavulanic acid in adults reported in literature** Cmax: maximum concentration; T: time; Vd: volume of distribution; Cl: clearance; AUC: area under the curve; ICU: intensive care; iv; intravenous

| Reference                                                     | Population             | Ratio | Clavulanic acid (mg/kg)                                                                                                                                        | Dosing frequency    | Daily dose clavulanic acid (mg/kg/day)                                                                                                                  |
|---------------------------------------------------------------|------------------------|-------|----------------------------------------------------------------------------------------------------------------------------------------------------------------|---------------------|---------------------------------------------------------------------------------------------------------------------------------------------------------|
| <i>IV clavulanic acid, co-administered with ticarcillin</i>   |                        |       |                                                                                                                                                                |                     |                                                                                                                                                         |
| <b>Burstein</b>                                               | Preterm                | 30:1  | 2.5                                                                                                                                                            | Every 8 hours       | 7.5                                                                                                                                                     |
| <b>Fayed</b>                                                  | Preterm/term           | 15:1  | 5                                                                                                                                                              | Every 12 hours      | 10                                                                                                                                                      |
| <b>Fricke</b>                                                 | Neonates < 36 wks      | 25:1  | 3.3                                                                                                                                                            | Every 8 hours       | 9.9                                                                                                                                                     |
|                                                               | Neonates > 36 wks      | 25:1  | 4                                                                                                                                                              |                     | 12                                                                                                                                                      |
| <b>Miall-Allen</b>                                            | Neonates               | 15:1  | 5                                                                                                                                                              | < 2 kg every 12 hrs | 10                                                                                                                                                      |
|                                                               |                        |       |                                                                                                                                                                | > 2 kg every 8 hrs  | 15                                                                                                                                                      |
| <b>Bégué (1)</b>                                              | Neonates               | 25:1  | 2.25                                                                                                                                                           | Every 6 hours       | 9                                                                                                                                                       |
|                                                               | Children               | 25:1  | 4                                                                                                                                                              | Every 6 hours       | 16                                                                                                                                                      |
| <b>Reed</b>                                                   | Children               | 30:1  | 1.7                                                                                                                                                            | Every 4 hours       | 6.8                                                                                                                                                     |
| <b>Jacobs</b>                                                 | Children & adolescents | 15:1  | 5                                                                                                                                                              | Single dose         | -                                                                                                                                                       |
|                                                               |                        | 30:1  | 2.5                                                                                                                                                            |                     | -                                                                                                                                                       |
| <b>Feldman</b>                                                | Adolescents            | 30:1  | 1.7                                                                                                                                                            | Every 4 hours       | 6.8                                                                                                                                                     |
| <i>Oral clavulanic acid, co-administered with amoxicillin</i> |                        |       |                                                                                                                                                                |                     |                                                                                                                                                         |
| <b>Al Roomi</b>                                               | Children               | 4:1   | <1 month: 4.76 mg/dose*<br>1-3 month: 6.35 mg/dose*<br>3-9 month: 7.9 mg/dose*<br>9 mnd-2 yr: 15.9 mg/dose*<br>2.5 yr: 31.75 mg/dose*<br>> 5 yr: 62.5 mg/dose* | Every 8 hours       | <1 month: 14.28 mg/day*<br>1-3 month: 19.05 mg/day<br>3-9 month: 23.7 mg/day<br>9 mnd-2 yr: 47.7 mg/day<br>2.5 yr: 95.25 mg/day<br>> 5 yr: 187.5 mg/day |
|                                                               |                        | 2:1   |                                                                                                                                                                |                     |                                                                                                                                                         |
| <b>Bégué (2)</b>                                              | Children               | 4:1   | 2.5<br>5                                                                                                                                                       | Single dose         | -                                                                                                                                                       |
| <b>Nelson</b>                                                 | Children               | 4:1   | 1.7                                                                                                                                                            | Single dose         | -                                                                                                                                                       |
|                                                               |                        |       | 3.3                                                                                                                                                            |                     | -                                                                                                                                                       |
| <b>van Niekerk</b>                                            | Children               | 4:1   | 2-5 yrs: 31.25mg/dose*<br>6-10 yrs: 62.5 mg/dose*                                                                                                              | Every 8 hours       | 93.75 mg/day*<br>187.5/mg/day                                                                                                                           |
| <b>Schaad</b>                                                 | Children               | 4:1   | 5                                                                                                                                                              | Single dose         | -                                                                                                                                                       |
| <b>Jehl</b>                                                   | Children               | 8:1   | 3.3                                                                                                                                                            | Every 8 hours       | 10                                                                                                                                                      |
| <b>Hoberman</b>                                               | Children               | 28:1  | 1.6                                                                                                                                                            | Every 12 hours      | 9.9                                                                                                                                                     |
|                                                               |                        |       | 1.425                                                                                                                                                          |                     | 12                                                                                                                                                      |
| <i>iv clavulanic acid, co-administered with amoxicillin</i>   |                        |       |                                                                                                                                                                |                     |                                                                                                                                                         |
| <b>Jones</b>                                                  | Children               | 10:1  | 5 mg                                                                                                                                                           | Single dose         | -                                                                                                                                                       |
| <b>de Cock</b>                                                | Children               | 10:1  | 3.5-7                                                                                                                                                          | Every 6 hours       | 14-28                                                                                                                                                   |
|                                                               |                        | 5:1   |                                                                                                                                                                |                     |                                                                                                                                                         |
| <b>Schaad</b>                                                 | Children               | 5:1   | 5 mg/kg                                                                                                                                                        | Single dose         | -                                                                                                                                                       |

**Table 2: dosing regimens of included studies**

\* fixed dosage based on age ranges, not dosed on kg bodyweight.

| Reference          | Sample management                                                                                                  | Analysis technique                                          | Additional details                                      |
|--------------------|--------------------------------------------------------------------------------------------------------------------|-------------------------------------------------------------|---------------------------------------------------------|
| <b>Al Roomi</b>    | Not specified                                                                                                      | Agar plate diffusion method<br><i>Klebsiella pneumoniae</i> | -                                                       |
| <b>Bégué (1)</b>   | Not specified                                                                                                      | Agar plate diffusion method<br><i>Klebsiella aerogenes</i>  | -                                                       |
| <b>Bégué (2)</b>   | Immediately centrifuged, stored at -80°C for max 3 days                                                            | Agar plate diffusion method<br><i>Klebsiella aerogenes</i>  | -                                                       |
| <b>Burstein</b>    | Immediately centrifuged, stored at -70°C                                                                           | Agar plate diffusion method<br><i>Klebsiella pneumoniae</i> | Linear assay from 0.08 to 5 mg/L<br>LLOQ: 0.078 mg/L    |
| <b>de Cock</b>     | Immediately centrifuged, stored at -80°C for max 3 months                                                          | UPLC- tandem mass spectrometry                              | LLOQ: 0.5 mg/L                                          |
| <b>Fayed</b>       | Not specified                                                                                                      | Agar plate diffusion method<br><i>Klebsiella pneumoniae</i> | -                                                       |
| <b>Feldman</b>     | Immediately centrifuged, stored at -70°C                                                                           | HPLC method                                                 | Linear assay from 0.25 to 5 µg/mL                       |
| <b>Fricke</b>      | Immediately centrifuged, stored at -70°C                                                                           | Agar plate diffusion method                                 | LLOQ: 0.16 mg/L                                         |
| <b>Hoberman</b>    | Not specified                                                                                                      | Not specified                                               | -                                                       |
| <b>Jacobs</b>      | Immediately centrifuged, stored at -70°C for max 60 days                                                           | HPLC method                                                 | Only provided for ticarcillin assay                     |
| <b>Jehl</b>        | Immediately centrifuged, stored at -80°C                                                                           | HPLC method                                                 | -                                                       |
| <b>Jones</b>       | Immediately centrifuged, stored at -70°C                                                                           | Agar plate diffusion method<br><i>Klebsiella pneumoniae</i> | LLOQ: 0.08 mg/L                                         |
| <b>Miall-Allen</b> | Immediately centrifuged, stored at -70°C                                                                           | Agar plate diffusion method<br>Bacteria not mentioned       | -                                                       |
| <b>Nelson</b>      | Immediately centrifuged, stored at -70°C for max 72 hours                                                          | Agar plate diffusion method<br><i>Klebsiella pneumoniae</i> | Linear assay<br>CV between 0.3 and 50 mg/L was 1.8-2.2% |
| <b>van Niekerk</b> | Immediately centrifuged, stored at -70°C for max 7 days                                                            | Agar plate diffusion method<br><i>Klebsiella aerogenes</i>  | -                                                       |
| <b>Reed</b>        | Immediately centrifuged, addition of morpholinopropane sulfonic acid to stabilize, stored at -70°C for max 45 days | HPLC method                                                 | Doubling dilutions from 1.6 to 0.1 µg/mL                |
| <b>Schaad</b>      | Mixed with sodium citrate, centrifuged, stored at -70°C for max 7 days                                             | Agar plate diffusion method<br><i>Klebsiella aerogenes</i>  | -                                                       |
| <b>Schaad</b>      | Mixed with sodium citrate, centrifuged, stored at -70°C for max 96 hours                                           | Agar plate diffusion method<br><i>Klebsiella aerogenes</i>  | -                                                       |

**Table 3. overview of sample management and used method of analysis.**

LLOQ: lower limit of quantification; CV: coefficient of variation

| Reference          | Reported adverse events/side effects/adverse reactions                                                                                                                                                   |
|--------------------|----------------------------------------------------------------------------------------------------------------------------------------------------------------------------------------------------------|
| <i>Burstein</i>    | Treatment well tolerated, no adverse events or laboratory abnormalities reported                                                                                                                         |
| <i>Fayed</i>       | Treatment well tolerated, no biochemical or hematological abnormalities, no adverse reactions reported                                                                                                   |
| <i>Fricke</i>      | Treatment well tolerated, no laboratory abnormalities or adverse reactions reported                                                                                                                      |
| <i>Miall-Allen</i> | No adverse local or generalized reactions to ticarcillin/clavulanic acid reported                                                                                                                        |
| <i>Bégué (1)</i>   | Intravenous administration was well tolerated. 1 case of erythema at injection site. 2 cases of allergic-type rash. 2 cases of moderate eosinophilia and 3 cases of neutropenia                          |
| <i>Reed</i>        | No clinical or laboratory abnormalities were associated with treatment administration                                                                                                                    |
| <i>Jacobs</i>      | Patients responded well to therapy, no further details provided                                                                                                                                          |
| <i>Feldman</i>     | Adverse reactions in 2 cases. 1 case of mild pruritic rash, 1 case of transient eosinophilia. Patients received other antimicrobials next to ticarcillin/clavulanic acid. No cessation of therapy needed |
| <i>Al Roomi</i>    | 1 case of severe diarrhea (withdrawal), 3 cases of vulvitis, 2 cases of loose stool. No biochemical or hematological abnormalities reported                                                              |
| <i>Bégué (2)</i>   | Not reported                                                                                                                                                                                             |
| <i>Nelson</i>      | Not reported                                                                                                                                                                                             |
| <i>Van Niekerk</i> | 1 case of transient drop in white cell count, no other biochemical or hematological abnormalities reported                                                                                               |
| <i>Schaad</i>      | Well tolerated, no local or systemic reactions reported                                                                                                                                                  |
| <i>Jehl</i>        | Not reported                                                                                                                                                                                             |
| <i>Hoberman</i>    | Diarrhea 17-25%, diaper dermatitis 22-33%                                                                                                                                                                |
| <i>Jones</i>       | Well tolerated, no drug related adverse events                                                                                                                                                           |
| <i>De Cock</i>     | Not reported                                                                                                                                                                                             |
| <i>Schaad</i>      | 3 cases of mild nausea without vomiting 1 hour after ingestion                                                                                                                                           |

**Table 4. Reported side effects, adverse events and reactions from included studies.**
